# Supplementary material for: Association between TP53 rs1042522 gene polymorphism and the risk of malignant bone tumors: a meta-analysis
Source: Oxford University Press journal article supplement (doi:10.1042/bsr20181832), 2019-03-01
Supplement: bsr-2018-1832_supp.pdf [file bsr-2018-1832_supp.pdf]

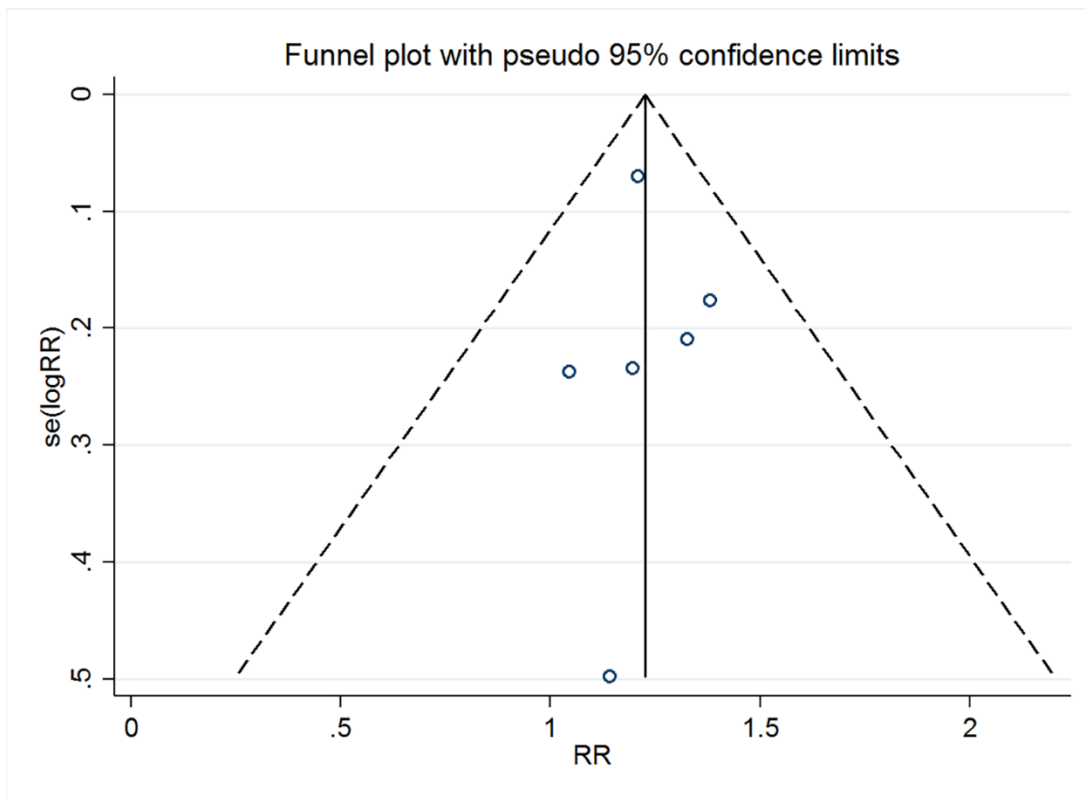

Figure S1. Funnel plot for TP53 rs1042522 polymorphism in malignant bone tumors.

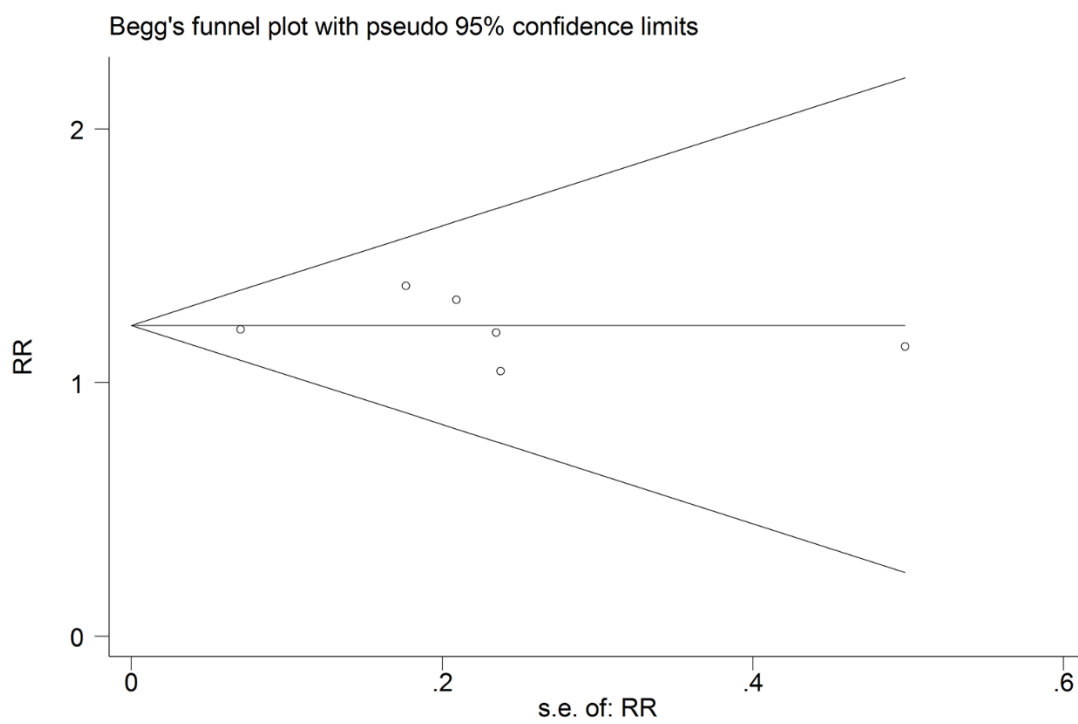

Figure S2. Begg's funnel plot for TP53 rs1042522 polymorphism in malignant bone tumors.

Egger's publication bias plot

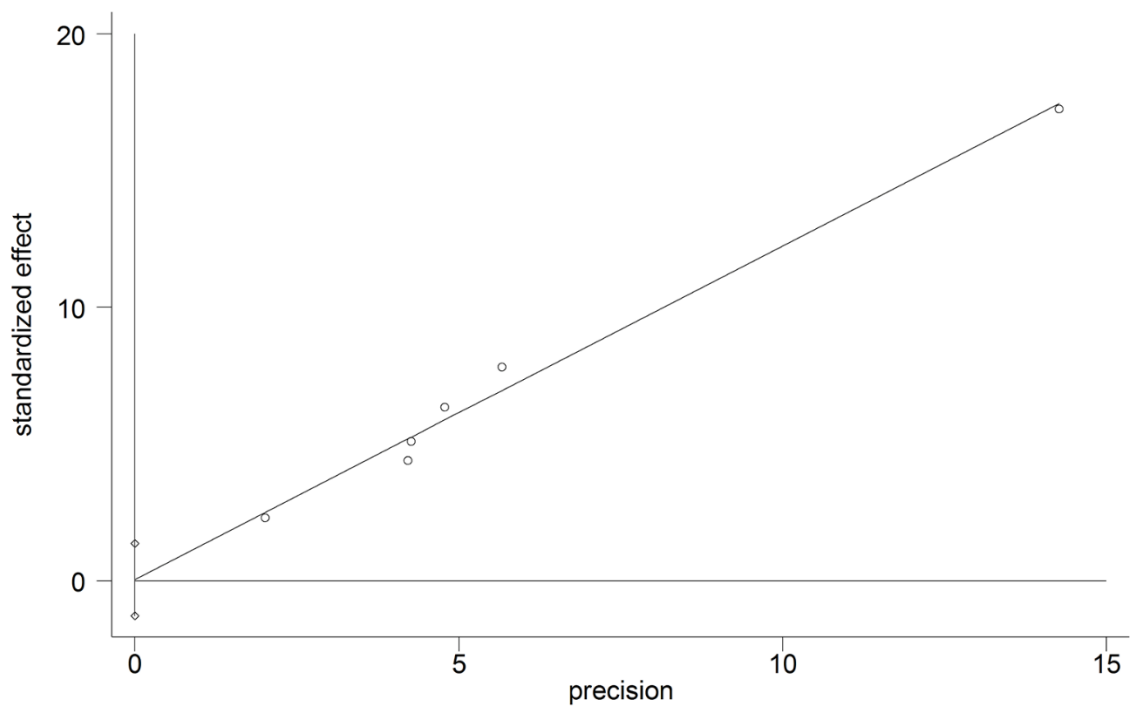

Figure S3. Egger's funnel plot for TP53 rs1042522 polymorphism in malignant bone tumors.

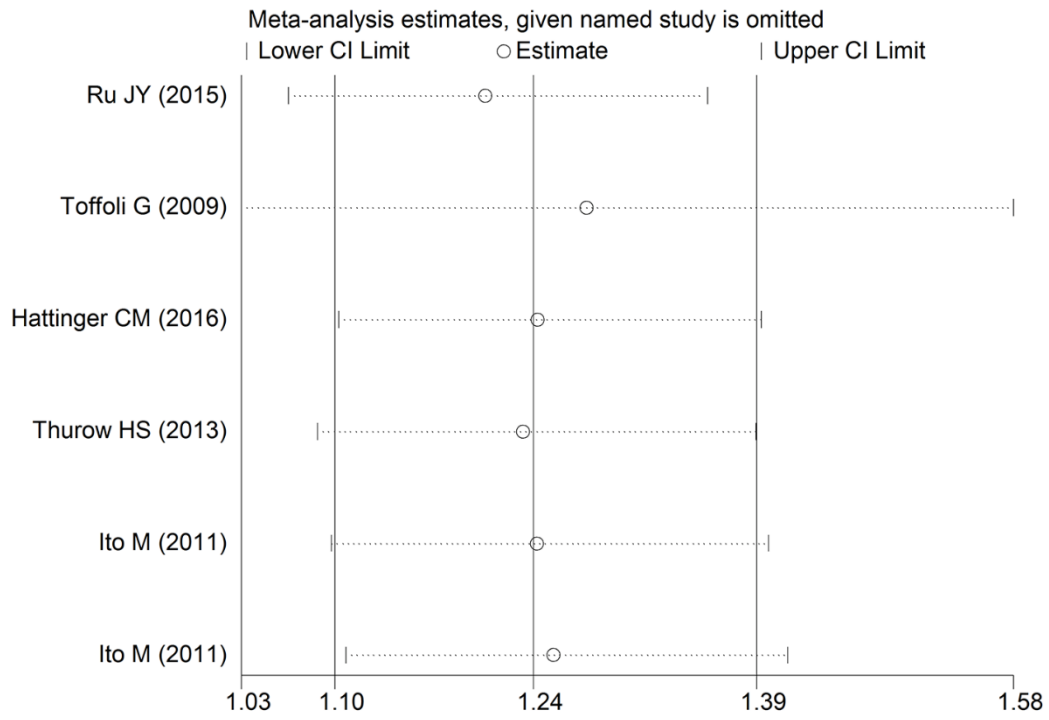

Figure S4. Sensitivity analysis for TP53 rs1042522 polymorphism in malignant bone tumors.
